# Supplementary material for: Classification and Verification of Handwritten Signatures with Time Causal Information Theory Quantifiers
Source: PLOS journal article supplement (doi:10.1371/journal.pone.0166868), 2016-12-01
Supplement: S3 (10.1371/journal.pone.0166868.s003) [file journal.pone.0166868.s003]

## Exploratory data analysis

Figs A, B, C, and D present the supplementary exploratory data analysis of those features that were not presented in the body of the article.

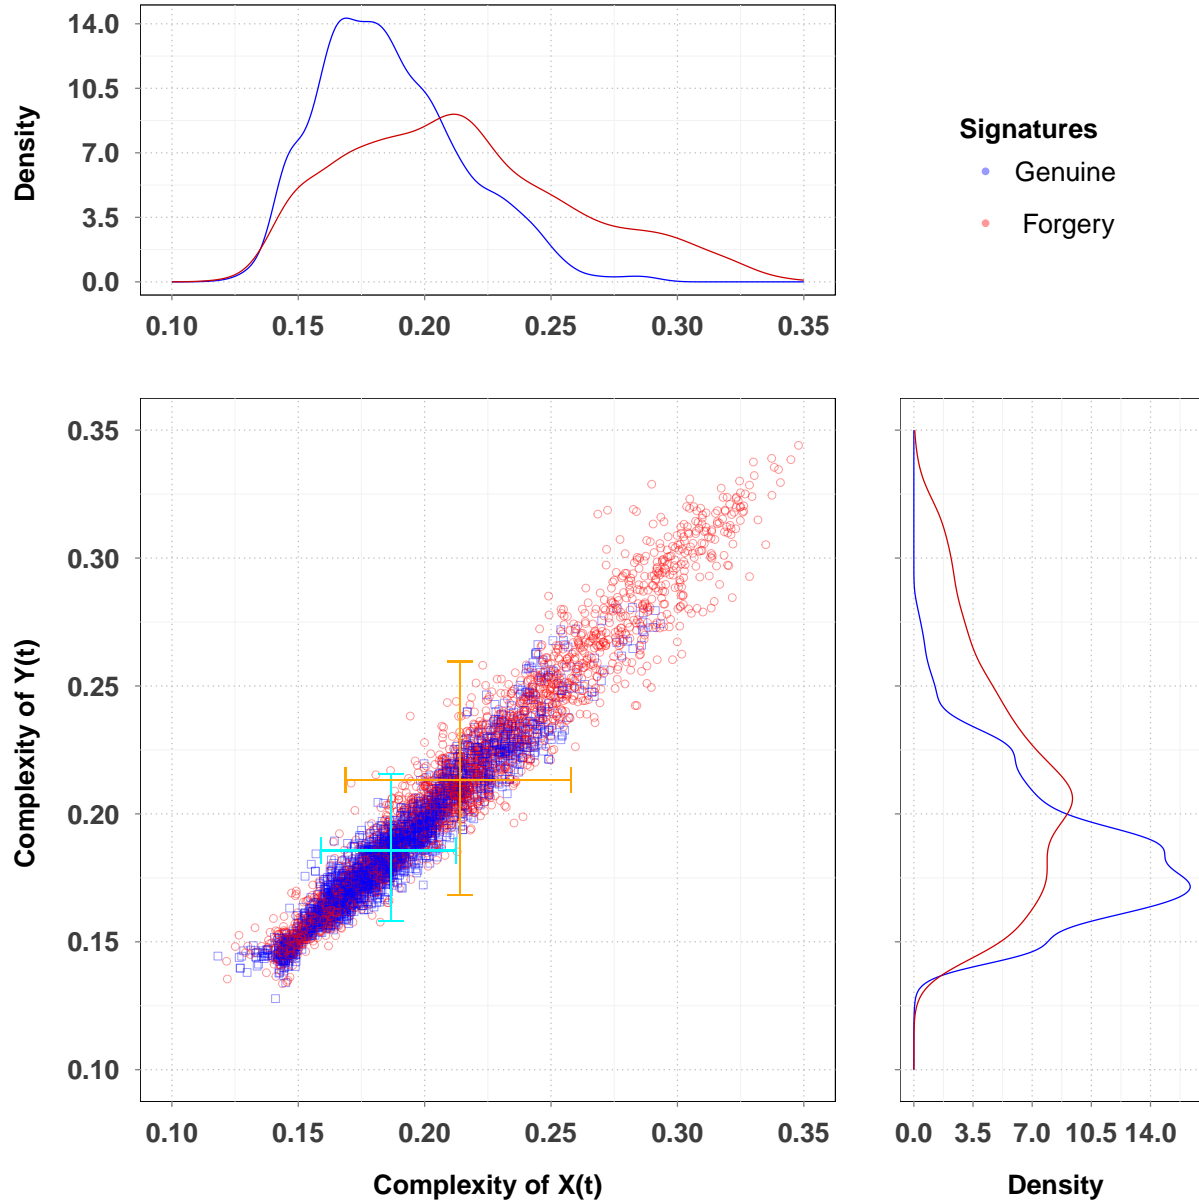

Figure A: Scatter plot with marginal kernel density estimates of complexity quantifiers in both trajectory coordinates time series  $\mathbf{X}$  and  $\mathbf{Y}$ . Genuine (blue) and skilled forgery signatures (red points), 100 subjects. Marginal kernel densities depict the distribution of statistical complexity along both axes.

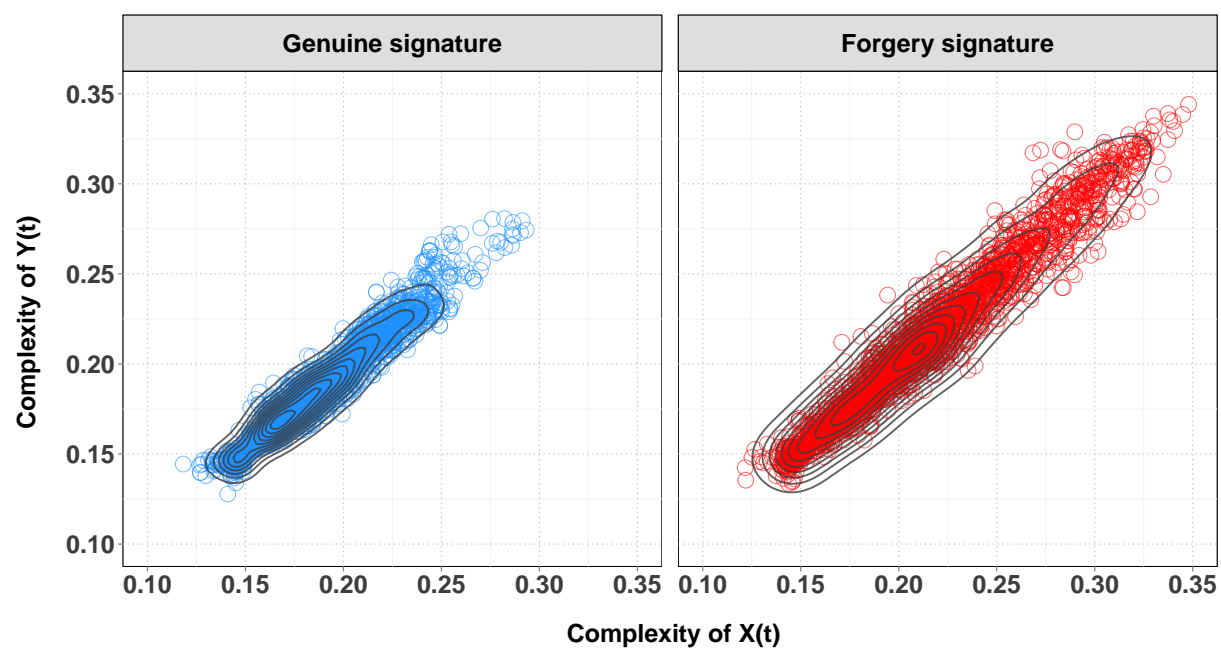

Figure B: Contour plot superimposed on the scatterplot of statistical complexity for genuine (right panel) and skilled forgery signatures (left panel).

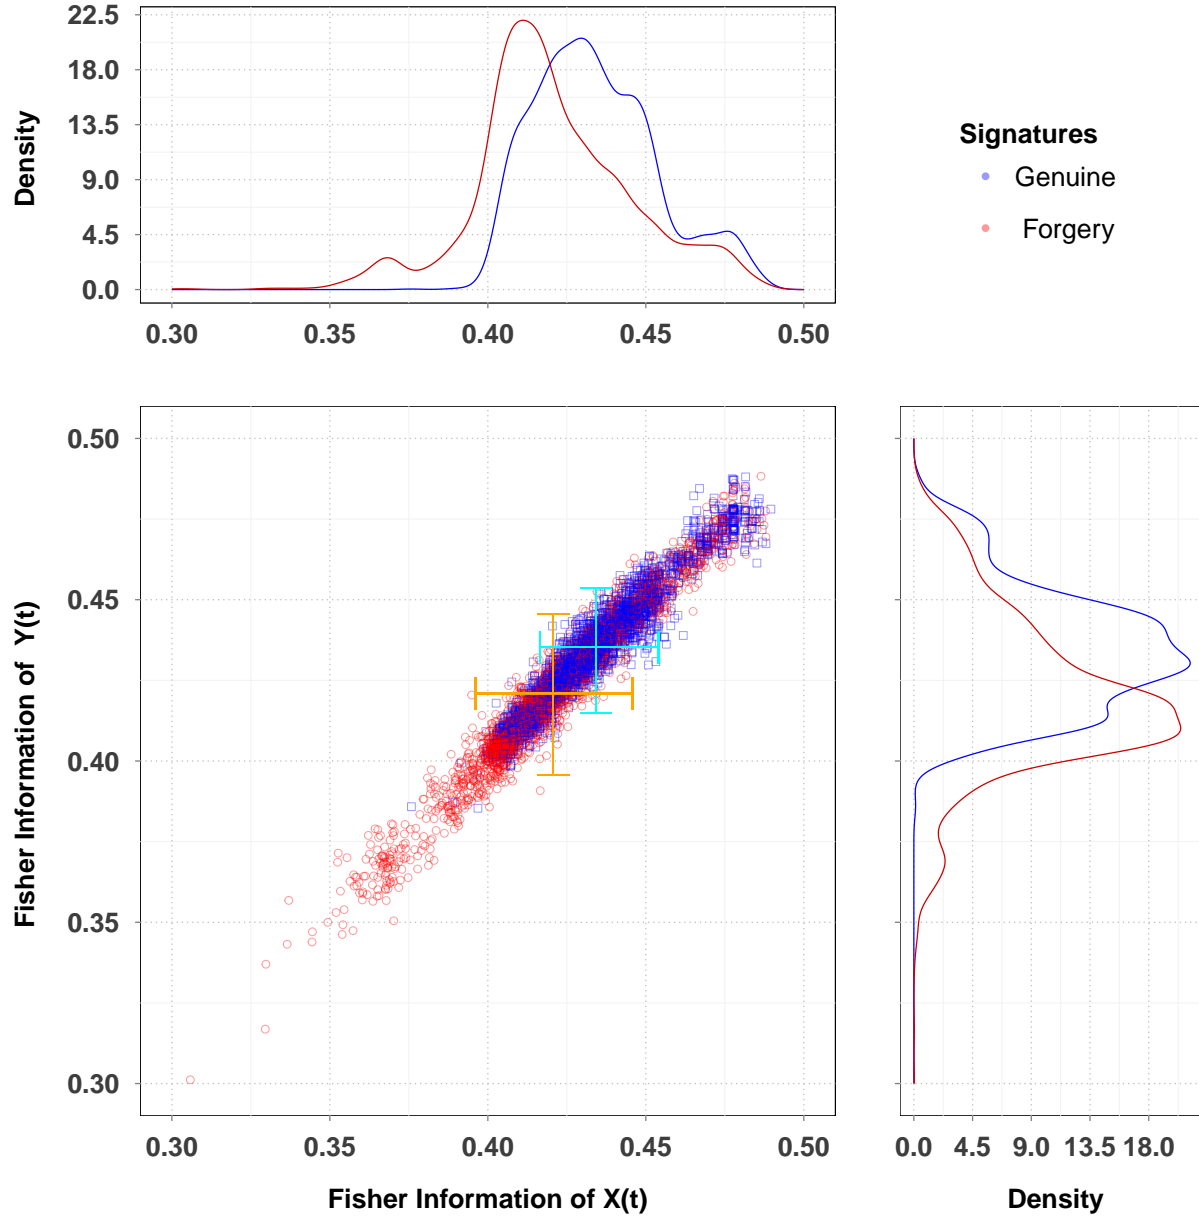

Figure C: Scatter plot with marginal kernel density estimates of Fisher information quantifiers in both trajectory coordinates time series  $\mathbf{X}$  and  $\mathbf{Y}$ . Genuine (blue) and skilled forgery signatures (red points), 100 subjects. Marginal kernel densities depict the distribution of Fisher information along both axes.

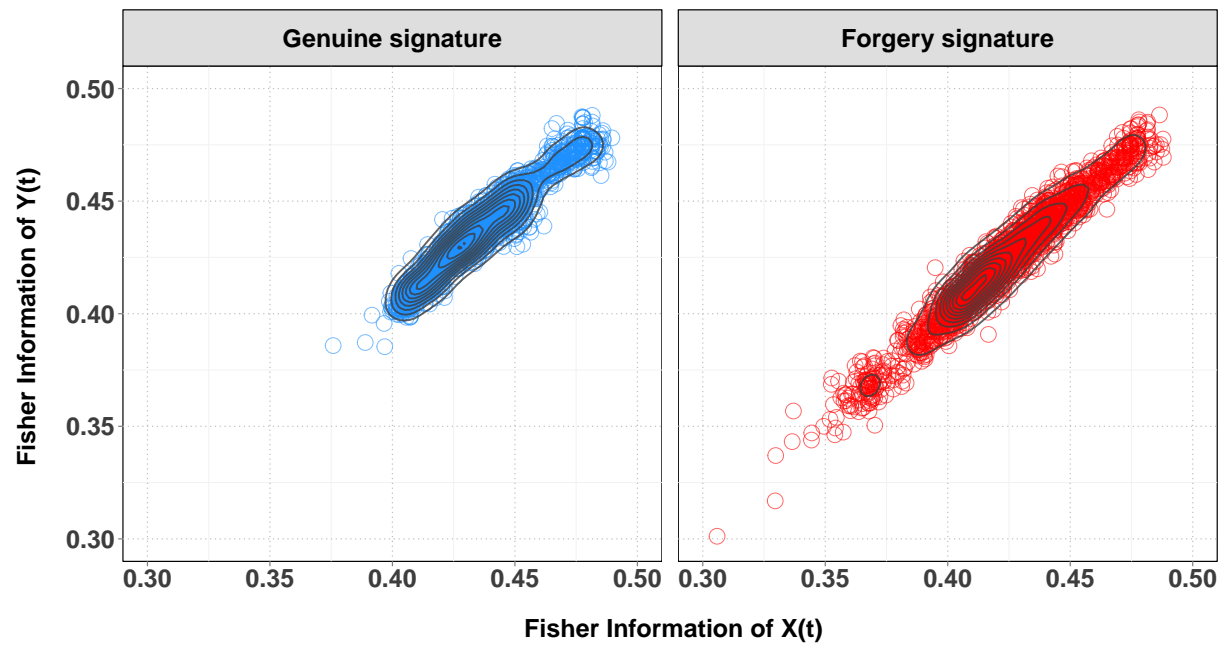

Figure D: Contour plot superimposed on the scatterplot of Fisher information quantifiers for genuine (right panel) and skilled forgery signatures (left panel).
