# Supplementary material for: Classification and Verification of Handwritten Signatures with Time Causal Information Theory Quantifiers
Source: PLOS journal article supplement (doi:10.1371/journal.pone.0166868), 2016-12-01
Supplement: S4 (10.1371/journal.pone.0166868.s004) [file journal.pone.0166868.s004]

## Signature classification

Figs A and B present the circular dendrograms of the two additional features: statistical complexity and Fisher information.

Figs C and D show the classification by the rule of the parallelepiped of genuine signatures using statistical complexity and Fisher information obtained as result of the application of entropy classification.

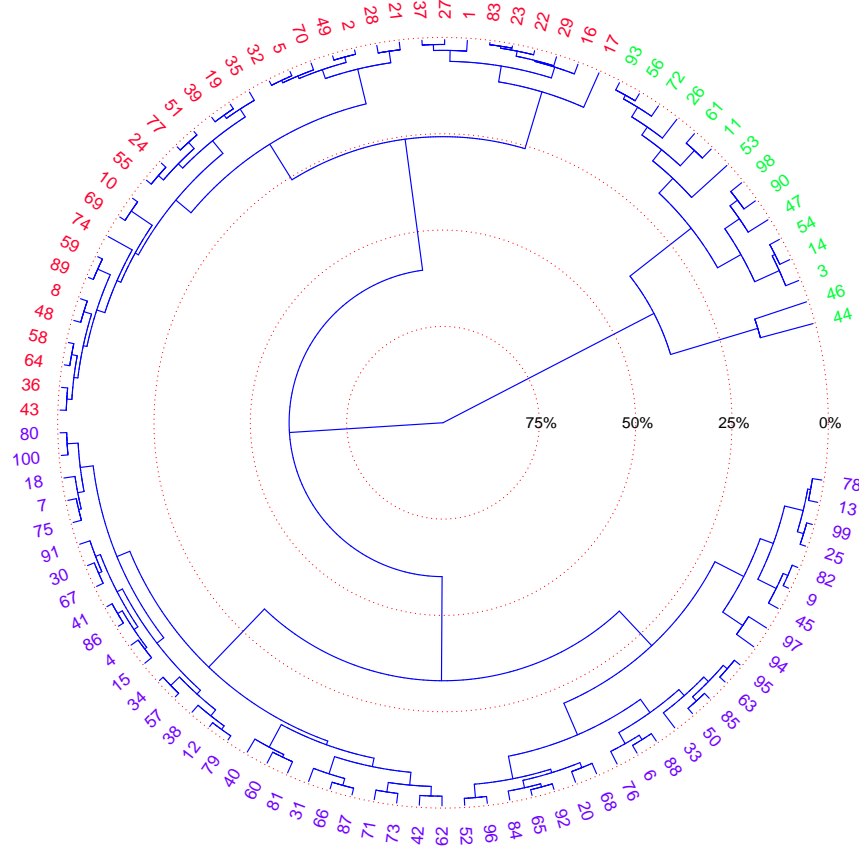

Figure A: Neighbor-joining, rooted, circular dendrogram clustering of genuine signatures by statistical complexity: H1, H2, and H3, in red, blue, and green, respectively.

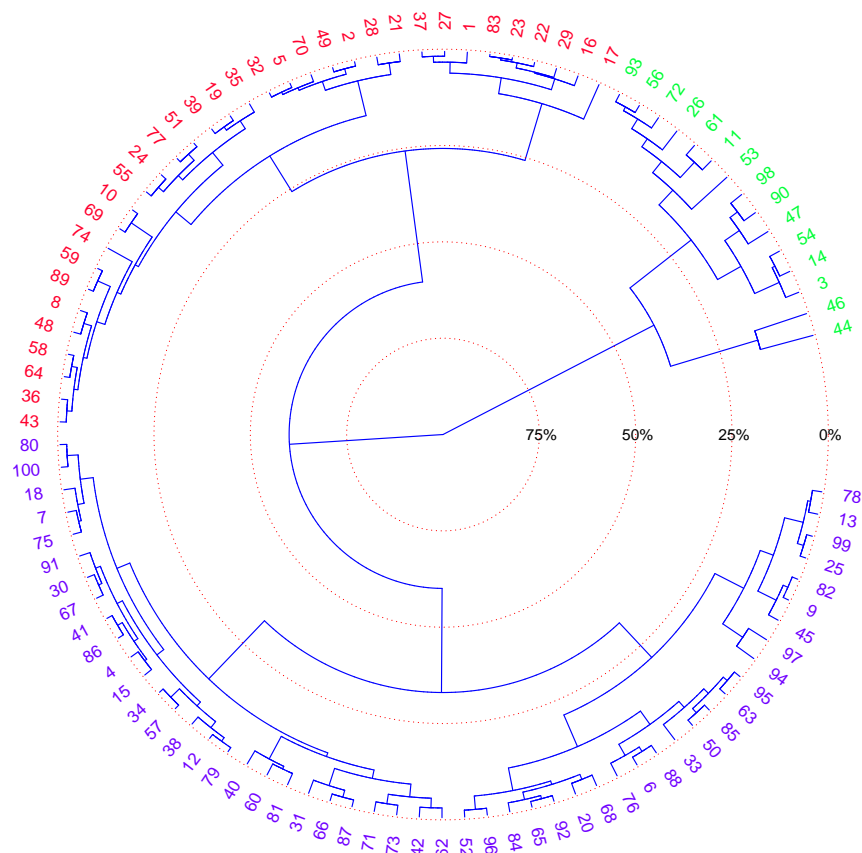

Figure B: Neighbor-joining, rooted, circular dendrogram clustering of genuine signatures by Fisher information: H1, H2, and H3, in red, blue, and green, respectively.

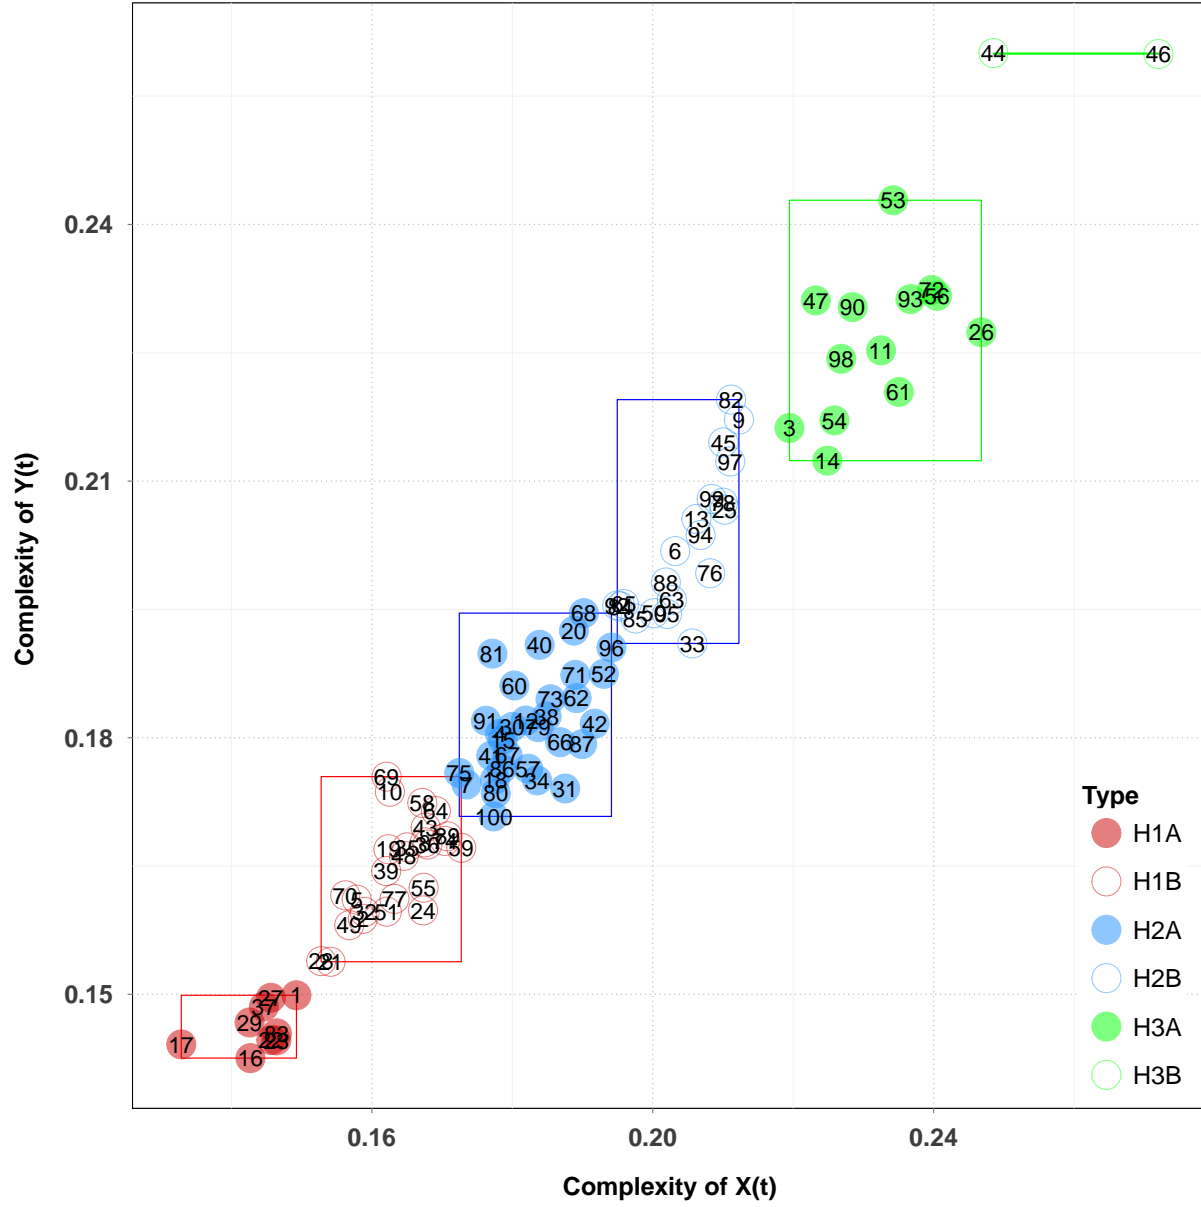

Figure C: Classification by the rule of the parallelepiped of genuine signatures using statistical complexity obtained as result of the application of entropy classification. Each subject is identified by its ID.

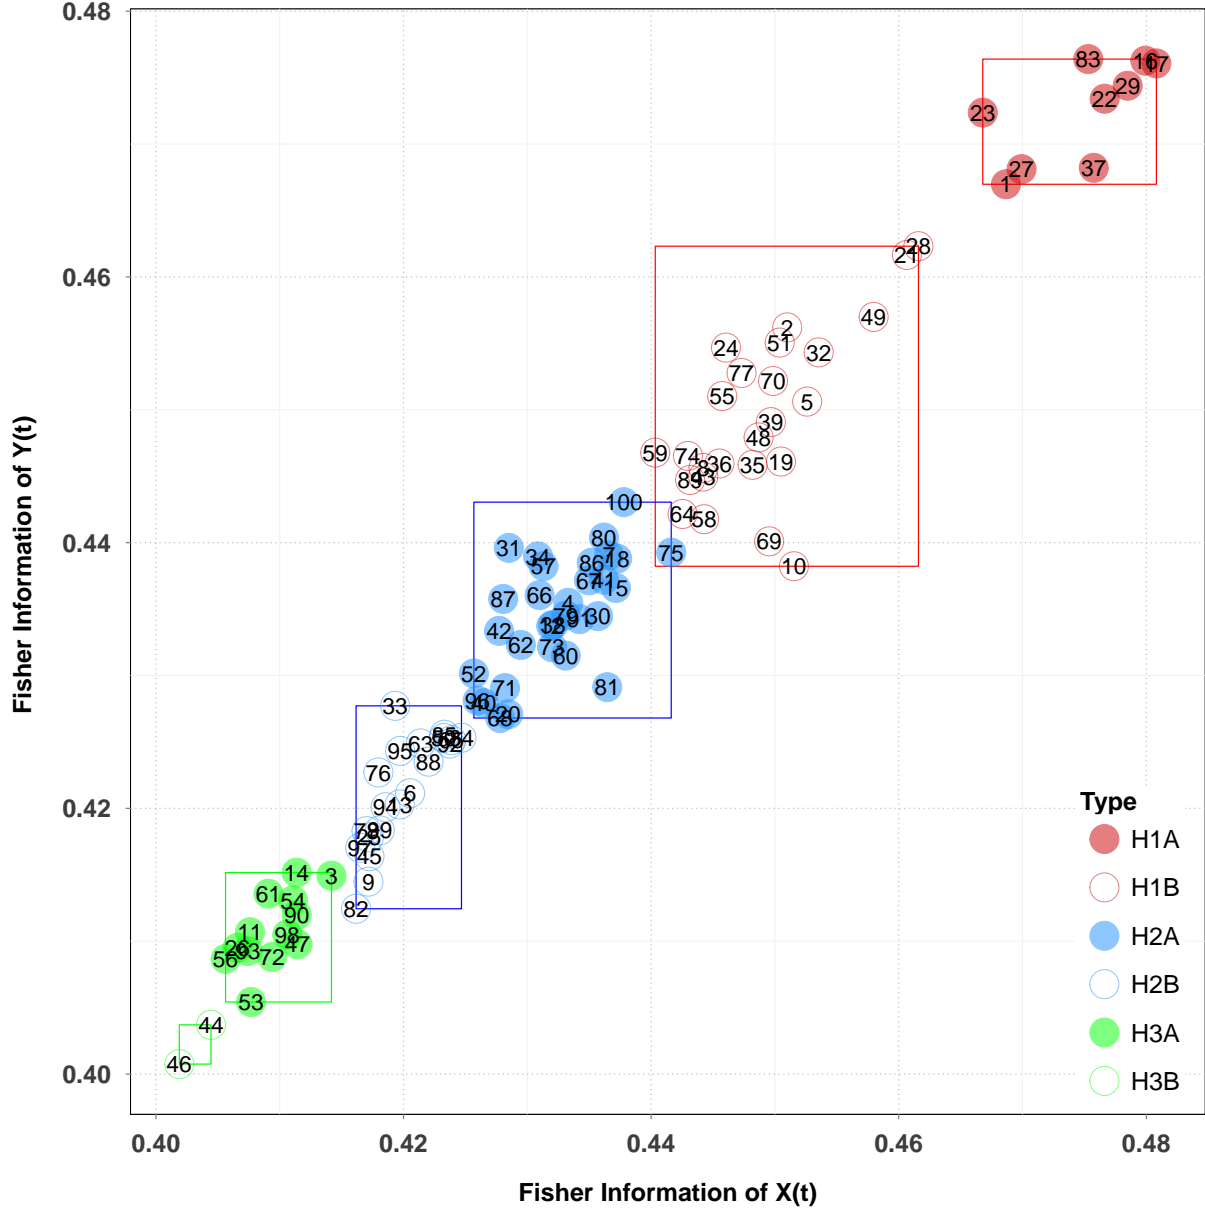

Figure D: Classification by the rule of the parallelepiped of genuine signatures using Fisher information obtained as result of the application of entropy classification. Each subject is identified by its ID.
